# Supplementary material for: Brassinolide Enhances the Level of Brassinosteroids, Protein, Pigments, and Monosaccharides in Wolffia arrhiza Treated with Brassinazole
Source: MDPI journal article supplement (doi:10.3390/plants10071311), 2021-06-28
Supplement: s1 [file s1]

**Table S1.** One-way ANOVA results

|                             | Degrees of freedom | Sum of squares | Mean squares | F-statistics | <i>p</i> -value |
|-----------------------------|--------------------|----------------|--------------|--------------|-----------------|
| <b>Biomass</b>              |                    |                |              |              |                 |
| Treatment                   | 10                 | 5.3099         | 0.53099      | 315.72       | < 2.2e-16       |
| Residuals                   | 44                 | 0.0740         | 0.00168      | —            | —               |
| <b>Protein</b>              |                    |                |              |              |                 |
| Treatment                   | 10                 | 1608.06        | 160.806      | 163.81       | < 2.2e-16       |
| Residuals                   | 44                 | 43.19          | 0.982        | —            | —               |
| <b>Monosaccharides</b>      |                    |                |              |              |                 |
| Treatment                   | 10                 | 18.523         | 1.85229      | 216.18       | < 2.2e-16       |
| Residuals                   | 44                 |                |              | —            | —               |
| <b>Brz</b>                  |                    |                |              |              |                 |
| Treatment                   | 10                 | 439929130      | 87985826     | 75.691       | 6.738e-14       |
| Residuals                   | 44                 | 27898507       | 1162438      | —            | —               |
| <b>BL</b>                   |                    |                |              |              |                 |
| Treatment                   | 10                 | 2933764        | 293376       | 138.21       | < 2.2e-16       |
| Residuals                   | 44                 | 93398          | 2123         | —            | —               |
| <b>EBL</b>                  |                    |                |              |              |                 |
| Treatment                   | 10                 | 2269.21        | 226.921      | 93.704       | < 2.2e-16       |
| Residuals                   | 44                 | 106.55         | 2.422        | —            | —               |
| <b>HBL</b>                  |                    |                |              |              |                 |
| Treatment                   | 10                 | 14.3743        | 1.43743      | 34.295       | < 2.2e-16       |
| Residuals                   | 44                 | 1.8442         | 0.04191      | —            | —               |
| <b>norBL</b>                |                    |                |              |              |                 |
| Treatment                   | 10                 | 1.32676        | 0.132676     | 46.687       | < 2.2e-16       |
| Residuals                   | 44                 | 0.12504        | 0.002842     | —            | —               |
| <b>CT</b>                   |                    |                |              |              |                 |
| Treatment                   | 10                 | 46.243         | 4.6243       | 18.494       | 1.159e-12       |
| Residuals                   | 44                 | 11.002         | 0.2500       | —            | —               |
| <b>CS</b>                   |                    |                |              |              |                 |
| Treatment                   | 10                 | 65.921         | 6.5921       | 90.15        | < 2.2e-16       |
| Residuals                   | 44                 | 3.217          | 0.0731       | —            | —               |
| <b>ECS</b>                  |                    |                |              |              |                 |
| Treatment                   | 10                 | 0.0116151      | 0.00116151   | 42.56        | < 2.2e-16       |
| Residuals                   | 44                 | 0.0012008      | 0.00002729   | —            | —               |
| <b>TY</b>                   |                    |                |              |              |                 |
| Treatment                   | 10                 | 1.99026        | 0.199026     | 41.044       | < 2.2e-16       |
| Residuals                   | 44                 | 0.21336        | 0.004849     | —            | —               |
| <b>6dTY</b>                 |                    |                |              |              |                 |
| Treatment                   | 10                 | 0.0228112      | 0.00228112   | 40.348       | < 2.2e-16       |
| Residuals                   | 44                 | 0.0024876      | 0.00005654   | —            | —               |
| <b>Chlorophyll <i>a</i></b> |                    |                |              |              |                 |
| Treatment                   | 10                 | 76266          | 7626.6       | 1254.2       | < 2.2e-16       |
| Residuals                   | 44                 | 268            | 6.1          | —            | —               |

|                                     |    |         |          |        |           |
|-------------------------------------|----|---------|----------|--------|-----------|
| <b>Chlorophyll <i>b</i></b>         |    |         |          |        |           |
| Treatment                           | 10 | 8245.1  | 824.51   | 280.56 | < 2.2e-16 |
| Residuals                           | 44 | 129.3   | 2.94     | —      | —         |
| <b><math>\alpha</math>—carotene</b> |    |         |          |        |           |
| Treatment                           | 10 | 15.1611 | 1.51611  | 622.02 | < 2.2e-16 |
| Residuals                           | 44 | 0.1072  | 0.00244  | —      | —         |
| <b><math>\beta</math>—carotene</b>  |    |         |          |        |           |
| Treatment                           | 10 | 21.3051 | 2.13051  | 430.27 | < 2.2e-16 |
| Residuals                           | 44 | 0.2179  | 0.00495  | —      | —         |
| <b>Neoxanthin</b>                   |    |         |          |        |           |
| Treatment                           | 10 | 8.0416  | 0.80416  | 631.81 | < 2.2e-16 |
| Residuals                           | 44 | 0.0560  | 0.00127  | —      | —         |
| <b>Violaxanthin</b>                 |    |         |          |        |           |
| Treatment                           | 10 | 2.63503 | 0.263503 | 2840.9 | < 2.2e-16 |
| Residuals                           | 44 | 0.00408 | 0.000093 | —      | —         |
| <b>Astaxanthin</b>                  |    |         |          |        |           |
| Treatment                           | 10 | 1.34940 | 0.13494  | 421.95 | < 2.2e-16 |
| Residuals                           | 44 | 0.01407 | 0.00032  | —      | —         |
| <b>Zeaxanthin</b>                   |    |         |          |        |           |
| Treatment                           | 10 | 66.487  | 6.6487   | 863.94 | < 2.2e-16 |
| Residuals                           | 44 | 0.339   | 0.0077   | —      | —         |
| <b>Cryptoxanthin</b>                |    |         |          |        |           |
| Treatment                           | 10 | 90.946  | 9.0946   | 661.55 | < 2.2e-16 |
| Residuals                           | 44 | 0.605   | 0.0137   | —      | —         |
| <b>Lutein</b>                       |    |         |          |        |           |
| Treatment                           | 10 | 1.09665 | 0.109665 | 420.13 | < 2.2e-16 |
| Residuals                           | 44 | 0.01149 | 0.000261 | —      | —         |
